# Supplementary material
Source: PubMed Central journal article supplement (PMC7984603)
Supplement: NIHMS1680594-supplement-1.pdf [file NIHMS1680594-supplement-1.pdf]

788

## Supplemental Materials

789

### 790 Supplementary Figure legends

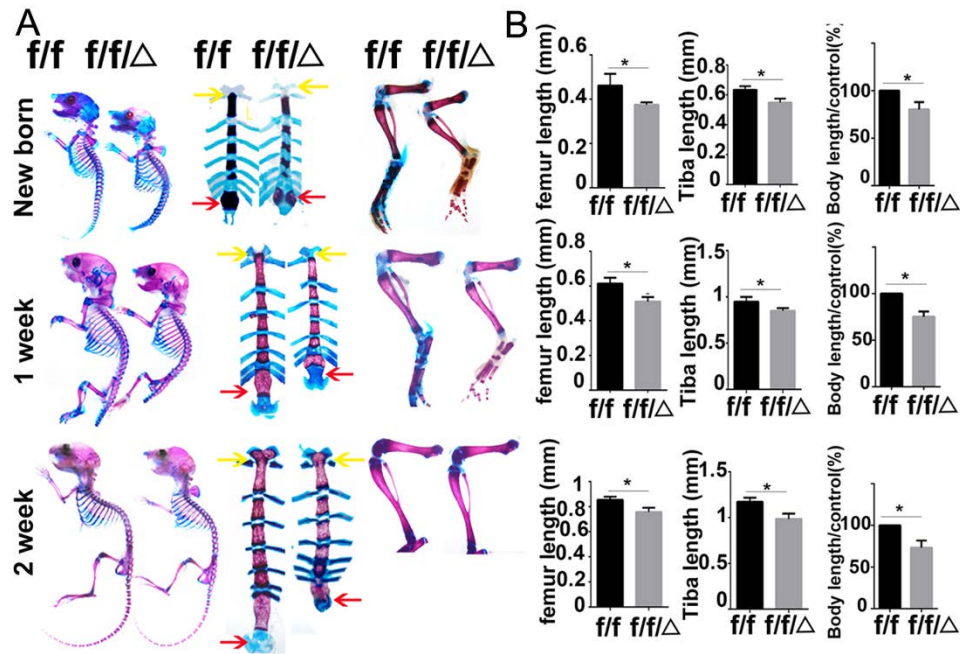

791

792 **Figure S1. Alizarin Red and Alcian blue staining.** (A) Alizarin red and alcian blue staining of  
793 newborn, 1-week and 2-week old mutant and control mice skeletons. Yellow arrows and red  
794 arrows illustrate the deformed xiphoid process in mutant mice. (B) Lengths of femur, tibia and  
795 body were evaluated in mice of newborn, 1-week, and 2-week old mice. All data are presented as  
796 mean  $\pm$  SD, n=4, NS denotes not significant, \*p<0.05.

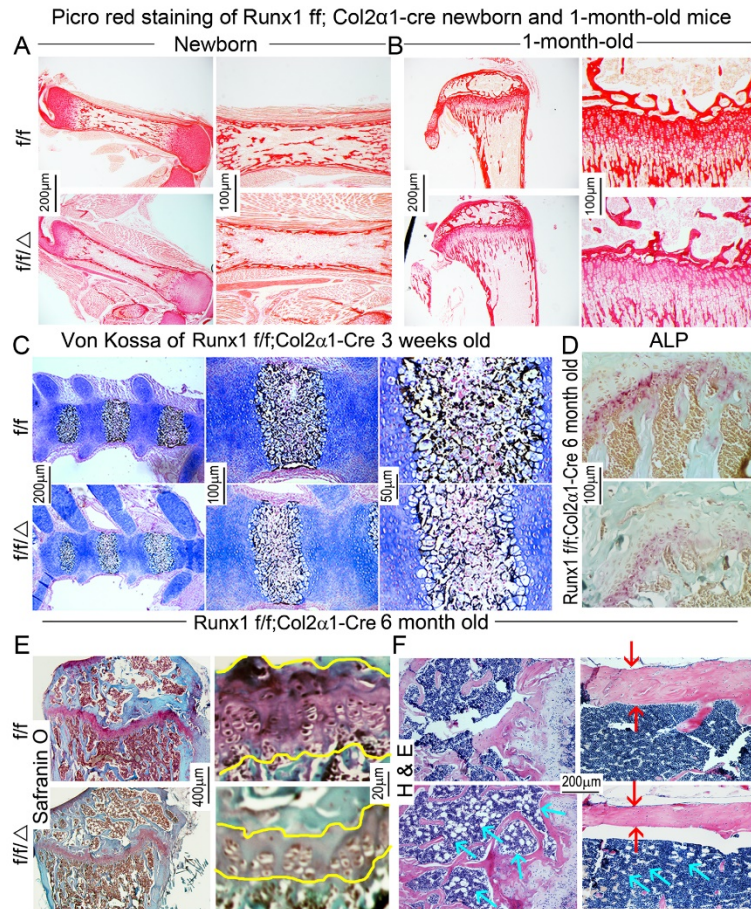

797

798 **Figure S2. Picro Sirius Red, ALP, Von Kossa, H&E and Safranin O staining for different**

799 **ages of *Runx1<sup>ff</sup>* and *Runx1<sup>ff</sup>col2α1-cre* mice.** (A) Picro Sirius Red staining of *Runx1<sup>ff</sup>* and

800 *Runx1<sup>ff</sup>col2α1-cre* newborn mice femur and (B) 1-month-old mice tibia. (C) Von Kossa staining

801 of *Runx1<sup>ff</sup>* and *Runx1<sup>ff</sup>col2α1-cre* 3-week-old mice vertebra. (D) ALP staining of *Runx1<sup>ff</sup>* and

802 *Runx1<sup>ff</sup>col2α1-cre* 6-month-old male mice femurs. (E) Safranin O and (F) H&E staining of

803 *Runx1<sup>ff</sup>* and *Runx1<sup>ff</sup>col2α1-cre* 6-month-old male mice femurs. Yellow areas illustrate the

804 *Runx1<sup>ff</sup>* and *Runx1<sup>ff</sup>col2α1-cre* chondrocyte zone, red arrows indicate the cortical bone thickness,

805 and blue arrows indicate adipocytes in *Runx1<sup>ff</sup>col2α1-cre* mice femurs.

806

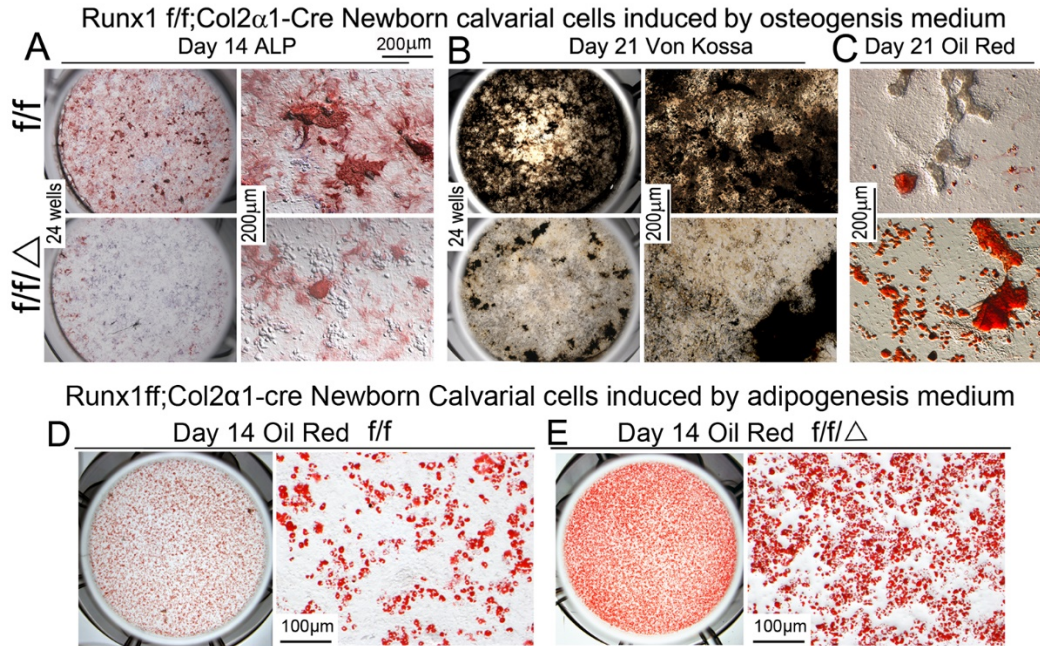

807

808 **Figure S3. ALP, Von Kossa, and Oil-Red staining of newborn *Runx1<sup>ff</sup>col2a1-cre* mice**

809 **calvarial cells cultured in osteogenesis or adipogenesis medium for 14 or 21 days. (A) ALP**

810 **staining of *Runx1<sup>ff</sup>* and *Runx1<sup>ff</sup>col2a1-cre* newborn mice calvarial cells after osteogenesis**

811 **induction for 14 days. (B, C) (B) Von Kossa staining and (C) Oil-Red staining of *Runx1<sup>ff</sup>* and**

812 ***Runx1<sup>ff</sup>col2a1-cre* newborn mice calvarial cells osteogenesis induction for 21 days. (D, E) Oil-**

813 **Red staining of (D) *Runx1<sup>ff</sup>* and (E) *Runx1<sup>ff</sup>col2a1-cre* newborn mice calvarial cells**

814 **adipogenesis induction for 14 days.**

815

816

817

818

819

820

821

822 **Supplementary Tables**823 **Table S1. Primers used for qPCR**

| Gene           | Forward primer         | Reverse primer         |
|----------------|------------------------|------------------------|
| <i>Runx1</i>   | GATGGCACTCTGGTCACCG    | GCCGCTCGGAAAAGGACAA    |
| <i>Runx2</i>   | AGAGACCACAATAACCAGCACG | GGCGGCCATATGACTACAAAG  |
| <i>Osx</i>     | ATGGCGTCCTCTCTGCTTG    | TGAAAGGTCAGCGTATGGCTT  |
| <i>Ocn</i>     | GAACAGACAAGTCCCACACAG  | GAGCTGCTGTGACATCCATAC  |
| <i>Col2a1</i>  | CGGCTTCCACACATCCTTAT   | CTGTCCTTCGGTGTCAAGG    |
| <i>Coll0a1</i> | TGCTGCCTCAAATACCCTTTCT | TGGCGTATGGGATGAAGTATTG |
| <i>Mmp13</i>   | TCCTCGGAGACTGGTAATGG   | TGATGAAACCTGGACAAGCA   |
| <i>Ihh</i>     | CCACTTCCGGGCCACATTTG   | GGCCACCACATCCTCCACCA   |
| <i>Pth1r</i>   | GTGAACGGGAGGTGTTTGA    | CCCGGACGATATTGATGAAG   |
| <i>Gapdh</i>   | CAATGACCCCTTCATTGACC   | GACAAGCTTCCCGTTCTCAG   |
| <i>Alp</i>     | CCTAGTTATTGCCCTTTGGCC  | TGCCTGCCCAAGAGAGAAA    |
| <i>Fabp4</i>   | AGCACCATAACCTTAGATGGGG | CGTGGAAGTGACGCCTTTCA   |
| <i>C/ebpa</i>  | CAAGAACAGCAACGAGTACCG  | GTCACTGGTCAACTCCAGCAC  |
| <i>Pparγ</i>   | GGAAGACCACTCGCATTTCCTT | GTAATCAGCAACCATTGGGTCA |

824

825

826

827

828

829 **Supplementary Tables**

830 **Table S2. Primers used for ChIP assay**

| Gene         | Forward primer        | Reverse primer        |
|--------------|-----------------------|-----------------------|
| <i>Ihh 1</i> | CCCAGCACCATTTGGCATTAG | CCCTCACAGCTAGGCCATTT  |
| <i>Ihh 2</i> | GCAAATGGAGTCCCAGGTGA  | GAAGAGAGTGCTGGGTGCTT  |
| <i>Ihh 3</i> | TGCAGGCACTGAAGATGTGT  | CCACCAGCAACCTATGCTCA  |
| <i>Ihh 4</i> | TCCTTTGGTAGAGGAAGGTGC | TCTTCCTCCCTCACCCCTCAC |
| <i>Ihh 5</i> | CAGGGACATGGATAGGGTGC  | GGGTCGAGTGAGAGGGGAAA  |

831

832

833

834 **Supplemental Tables**

835 **Table S3. Primers used for subcloning**

| Gene          | Primer                                |
|---------------|---------------------------------------|
| <i>Ihh F1</i> | CCGACGCGTAAGCTTCCCAGCACCATTTGGCATTAG  |
| <i>Ihh F2</i> | CCGACGCGTAAGCTTCTACTGTGTAGACCAGGCTAGC |
| <i>Ihh F3</i> | CCGACGCGTAAGCTTGCAAATGGAGTCCCAGGTGA   |
| <i>Ihh F4</i> | CCGACGCGTAAGCTTTGCAGGCACTGAAGATGTGT   |
| <i>Ihh F5</i> | CCGACGCGTAAGCTTCTTGTAAGTGCGCGTAAACCC  |
| <i>Ihh R</i>  | CCGCTCGAGCGCCTCGACTCTGAGCTG           |

836

837

838
